# Supplementary material for: Structure evolution in “114” oxides CaBaZn2Ga2−xAlxO7 (x = 0, 1, 2) and layered cationic ordering in tetrahedral sites for CaBaZn2Al2O7
Source: Royal Society of Chemistry journal article supplement (doi:10.1039/c5dt00491h), 2015-01-01
Supplement: c5dt00491h1.pdf [file c5dt00491h1.pdf]

Electronic Supplementary Information for

Structure evolution in “114” oxides  $\text{CaBaZn}_2\text{Ga}_{2-x}\text{Al}_x\text{O}_7$  ( $x = 0, 1, 2$ )  
and layered cationic ordering in tetrahedral sites for  $\text{CaBaZn}_2\text{Al}_2\text{O}_7$

*Pengfei Jiang, Wenliang Gao, Rihong Cong,\* and Tao Yang\**

College of Chemistry and Chemical Engineering, Chongqing University, Chongqing 400044, P. R. China

\*Correspondence authors, Email: [congrihong@cqu.edu.cn](mailto:congrihong@cqu.edu.cn) and [taoyang@cqu.edu.cn](mailto:taoyang@cqu.edu.cn); Tel: (8623)65105065, Fax: (8623)65105065.

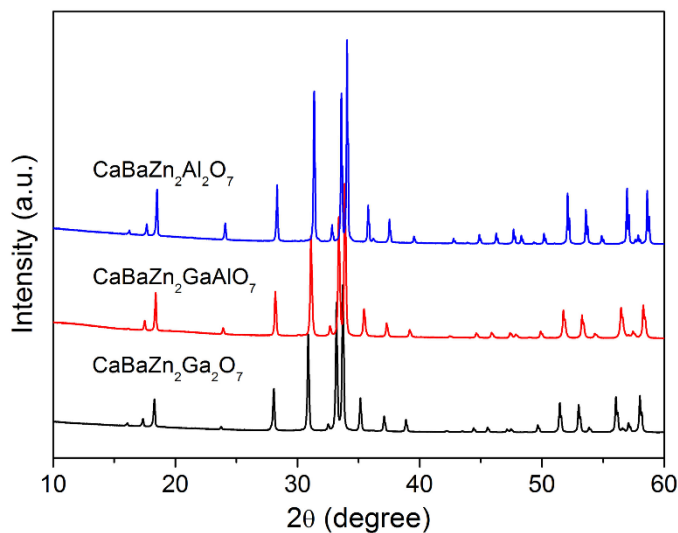

Fig. S1 Powder XRD patterns for  $\text{CaBaZn}_2\text{Ga}_{2-x}\text{Al}_x\text{O}_7$ . By  $\text{Al}^{3+}$ -substitution into the parent compound  $\text{CaBaZn}_2\text{Ga}_2\text{O}_7$ , the reflection peaks shift to higher angles, which indicate the decrease of the unit cell volume.
